# Supplementary material for: Health‐Related Quality of Life and Its Association With Outcomes in Adults With Congenital Heart Disease and Heart Failure: Insight From FRESH‐ACHD Registry
Source: PubMed Central journal article supplement — J Am Heart Assoc. 2023 Apr 7;12(8):e027819. doi: 10.1161/JAHA.122.027819 (PMC10227248; doi:10.1161/jaha.122.027819), 2023-04-07

# **SUPPLEMENTAL MATERIAL**

**Table S1. Comparison of baseline characteristics between patients with and without available quality of life data.**

|                                          | Total (n = 339) | SF36 available (n=196) | SF36 not available (n=143) | P-value |
|------------------------------------------|-----------------|------------------------|----------------------------|---------|
| <b>Demographics</b>                      |                 |                        |                            |         |
| Age (years)                              | 44.3 (+/- 13.9) | 44.3 (+/- 13.8)<br>*   | 44.3 (+/- 14.0)            | 0.992   |
| Male (%)                                 | 179 (53)        | 100 (51)               | 79 (55)                    | 0.442   |
| <b>Medical history</b>                   |                 |                        |                            |         |
| Congenital Heart Disease                 |                 |                        |                            | 0.986   |
| <i>Simple</i>                            | 30 (9)          | 17 (9)                 | 13 (9)                     |         |
| <i>Moderate</i>                          | 119 (35)        | 69 (35)                | 50 (35)                    |         |
| <i>Complex</i>                           | 187 (56)        | 109 (56)               | 78 (55)                    |         |
| Previous cardiac surgery                 | 282 (83)        | 167 (85)               | 115 (80)                   | 0.245   |
| Renal failure                            | 23 (7)          | 9 (5)                  | 14 (10)                    | 0.052   |
| COPD                                     | 16 (5)          | 8 (4)                  | 8 (6)                      | 0.514   |
| PAH                                      | 68 (20)         | 35 (18)                | 33 (23)                    | 0.236   |
| Diabetes                                 | 15 (4)          | 9 (5)                  | 6 (4)                      | 0.872   |
| History of heart failure hospitalization | 115 (56)        | 61 (54)                | 54 (58)                    | 0.605   |
| Depression                               | 25 (8)          | 17 (9)                 | 8 (6)                      | 0.290   |
| <b>Clinical characteristics</b>          |                 |                        |                            |         |
| BMI (kg/m <sup>2</sup> )                 | 24.8 (+/- 5.8)  | 25.4 (+/-6.0)          | 25.0 (+/-5.6)              | 0.748   |
| NYHA                                     |                 |                        | p for III/IV vs others :   | 0.821   |
| <i>I</i>                                 | 33 (10)         | 23 (12)                | 10 (8)                     |         |
| <i>II</i>                                | 135 (42)        | 77 (41)                | 58 (44)                    |         |
| <i>III</i>                               | 122 (38)        | 70 (37)                | 52 (40)                    |         |
| <i>IV</i>                                | 29 (9)          | 18 (10)                | 11 (8)                     |         |
| Systolic blood pressure (mmHg)           | 117 (+/-16)     | 117 (+/-17)            | 117 (+/- 15)               | 0.669   |

|                                         |                       |                 |                 |            |
|-----------------------------------------|-----------------------|-----------------|-----------------|------------|
| Diastolic blood pressure (mmHg)         | 68 (+/- 12)           | 67 (+/- 12)     | 70 (+/- 11)     | 0.048      |
| Heart beat (b.p.m)                      | 77 (+/- 19)           | 77 (+/- 19)     | 77 (+/- 20)     | 0.790      |
| Sodium (mmol/L)                         | 139 (+/- 3)           | 139 (+/- 3)     | 138 (+/- 4)     | 0.111      |
| BNP (ng/L)                              | 245 [133 - 615]<br>** | 220 [129 - 507] | 297 [147 - 806] | 0.156      |
| GFR (MDRD)                              | 88 (+/- 31)           | 90 (+/- 32)     | 85 (+/- 30)     | 0.184      |
| Haemoglobin                             | 14.1 (+/- 2.7)        | 14.0 (+/- 2.7)  | 14.2 (+/- 2.8)  | 0.575      |
| VEF (%)                                 | 46.9 (+/- 12.3)       | 46.6 (+/- 11.6) | 47.3 (+/- 13.5) | 0.683      |
| Medication at the time of the inclusion |                       |                 |                 |            |
| Loop diuretics                          | 192 (59)              | 113 (59)        | 79 (59)         | 0.985      |
| ACE inhibitors                          | 113 (35)              | 82 (43)         | 31 (23)         | <<br>0.001 |
| Beta-blockers                           | 180 (55)              | 120 (63)        | 60 (45)         | 0.002      |

\* Mean (+/- standard deviation); \*\* Median [interquartile range]; \*\*\* Death or transplantation or HF hospitalisation or circulatory support. ACE, angiotensin conversion enzyme; BMI, body mass index; BNP, brain natriuretic peptide; COPD, Chronic obstructive pulmonary disease; EF, ejection fraction; GFR, glomerular filtration rate; PAH, pulmonary arterial.

**Figure S1. The survival curve with censored data.**

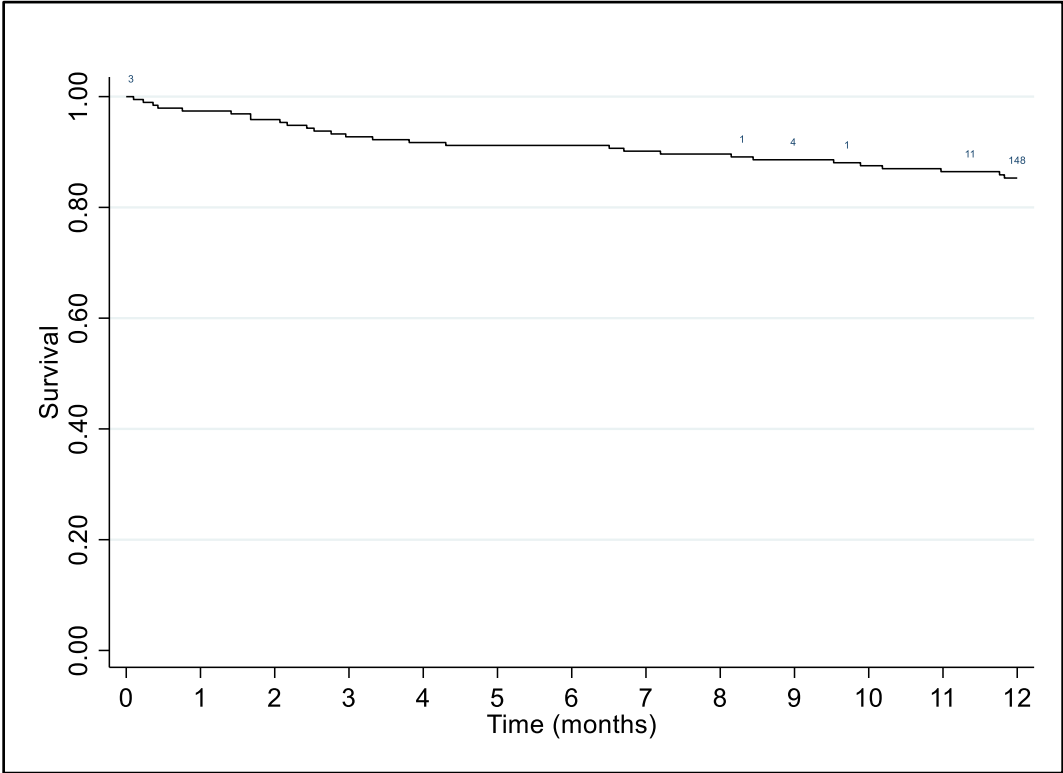

Supplement: JAH3-12-e027819-s001.pdf [file JAH3-12-e027819-s001.pdf]
